# Supplementary material
Source: MDPI journal article supplement (https://www.mdpi.com/2073-4352/2/3/1248)
Supplement: s1 [file s1]

  
data_s2162 
  
_audit_creation_method            SHELXL-97 
_chemical_name_systematic 
; 
 ? 
; 
_chemical_name_common             ? 
_chemical_melting_point           ? 
_chemical_formula_moiety          ? 
_chemical_formula_sum 
 'C11 H10 N2 O3' 
_chemical_formula_weight          218.21 
  
loop_ 
 _atom_type_symbol 
 _atom_type_description 
 _atom_type_scat_dispersion_real 
 _atom_type_scat_dispersion_imag 
 _atom_type_scat_source 
 'C'  'C'   0.0033   0.0016 
 'International Tables Vol C Tables 4.2.6.8 and 6.1.1.4' 
 'H'  'H'   0.0000   0.0000 
 'International Tables Vol C Tables 4.2.6.8 and 6.1.1.4' 
 'N'  'N'   0.0061   0.0033 
 'International Tables Vol C Tables 4.2.6.8 and 6.1.1.4' 
 'O'  'O'   0.0106   0.0060 
 'International Tables Vol C Tables 4.2.6.8 and 6.1.1.4' 
  
_symmetry_cell_setting            Monoclinic 
_symmetry_space_group_name_H-M    P2(1)/c 
  
loop_ 
 _symmetry_equiv_pos_as_xyz 
 'x, y, z' 
 '-x, y+1/2, -z+1/2' 
 '-x, -y, -z' 
 'x, -y-1/2, z-1/2' 
  
_cell_length_a                    9.5408(16) 
_cell_length_b                    9.5827(16) 
_cell_length_c                    11.580(2) 
_cell_angle_alpha                 90.00 
_cell_angle_beta                  105.838(3) 
_cell_angle_gamma                 90.00 
_cell_volume                      1018.5(3) 
_cell_formula_units_Z             4 
_cell_measurement_temperature     130(2) 
_cell_measurement_reflns_used     2077 
_cell_measurement_theta_min       3.04 
_cell_measurement_theta_max       27.74 
  
_exptl_crystal_description        prism 
_exptl_crystal_colour             colourless 
_exptl_crystal_size_max           0.40 
_exptl_crystal_size_mid           0.39 
_exptl_crystal_size_min           0.21 
_exptl_crystal_density_meas       ? 
_exptl_crystal_density_diffrn     1.423 
_exptl_crystal_density_method     'not measured' 
_exptl_crystal_F_000              456 
_exptl_absorpt_coefficient_mu     0.106 
_exptl_absorpt_correction_type   multi-scan 
_exptl_absorpt_process_details    '(SADABS; Sheldrick, 2004)' 
_exptl_absorpt_correction_T_min   0.9589 
_exptl_absorpt_correction_T_max   0.9781 
  
_exptl_special_details 
; 
 ? 
; 
  
_diffrn_ambient_temperature       130(2) 
_diffrn_radiation_wavelength      0.71073 
_diffrn_radiation_type            MoK\a 
_diffrn_radiation_source         'sealed tube' 
_diffrn_radiation_monochromator  'graphite' 
_diffrn_measurement_device_type  'Bruker AXS SMART APEX' 
_diffrn_measurement_method       '\f and \w scans' 
_diffrn_standards_number          ? 
_diffrn_standards_interval_count  ? 
_diffrn_standards_interval_time   ? 
_diffrn_standards_decay_%         ? 
_diffrn_reflns_number             7713 
_diffrn_reflns_av_R_equivalents   0.0344 
_diffrn_reflns_av_sigmaI/netI     0.0351 
_diffrn_reflns_limit_h_min        -12 
_diffrn_reflns_limit_h_max        12 
_diffrn_reflns_limit_k_min        -12 
_diffrn_reflns_limit_k_max        11 
_diffrn_reflns_limit_l_min        -15 
_diffrn_reflns_limit_l_max        15 
_diffrn_reflns_theta_min          2.22 
_diffrn_reflns_theta_max          27.88 
_reflns_number_total              2402 
_reflns_number_gt                 1947 
_reflns_threshold_expression      >2sigma(I) 
  
_computing_data_collection      'SMART (Bruker, 2002)' 
_computing_cell_refinement      'SAINT (Bruker, 2002)' 
_computing_data_reduction       'SAINT' 
_computing_structure_solution   'SHELXTL (Sheldrick, 2008)' 
_computing_structure_refinement 'SHELXTL' 
_computing_molecular_graphics   'SHELXTL' 
_computing_publication_material 'SHELXTL and local programs' 
  
_refine_special_details 
; 
 Refinement of F^2^ against ALL reflections.  The weighted R-factor wR and 
 goodness of fit S are based on F^2^, conventional R-factors R are based 
 on F, with F set to zero for negative F^2^. The threshold expression of 
 F^2^ > 2sigma(F^2^) is used only for calculating R-factors(gt) etc. and is 
 not relevant to the choice of reflections for refinement.  R-factors based 
 on F^2^ are statistically about twice as large as those based on F, and R- 
 factors based on ALL data will be even larger. 
; 
  
_refine_ls_structure_factor_coef  Fsqd 
_refine_ls_matrix_type            full 
_refine_ls_weighting_scheme       calc 
_refine_ls_weighting_details 
 'calc w=1/[\s^2^(Fo^2^)+(0.0558P)^2^+0.2302P] where P=(Fo^2^+2Fc^2^)/3' 
_atom_sites_solution_primary      direct 
_atom_sites_solution_secondary    difmap 
_atom_sites_solution_hydrogens    difmap 
_refine_ls_hydrogen_treatment     constr 
_refine_ls_extinction_method      none 
_refine_ls_extinction_coef        ? 
_refine_ls_number_reflns          2402 
_refine_ls_number_parameters      147 
_refine_ls_number_restraints      0 
_refine_ls_R_factor_all           0.0553 
_refine_ls_R_factor_gt            0.0429 
_refine_ls_wR_factor_ref          0.1098 
_refine_ls_wR_factor_gt           0.1021 
_refine_ls_goodness_of_fit_ref    1.048 
_refine_ls_restrained_S_all       1.048 
_refine_ls_shift/su_max           0.000 
_refine_ls_shift/su_mean          0.000 
  
loop_ 
 _atom_site_label 
 _atom_site_type_symbol 
 _atom_site_fract_x 
 _atom_site_fract_y 
 _atom_site_fract_z 
 _atom_site_U_iso_or_equiv 
 _atom_site_adp_type 
 _atom_site_occupancy 
 _atom_site_symmetry_multiplicity 
 _atom_site_calc_flag 
 _atom_site_refinement_flags 
 _atom_site_disorder_assembly 
 _atom_site_disorder_group 
O1 O 0.86597(11) 0.16663(12) 0.21852(8) 0.0254(3) Uani 1 1 d . . . 
H1 H 0.9074 0.1898 0.2896 0.038 Uiso 1 1 calc R . . 
O2 O 1.17490(12) 0.39901(12) -0.10639(8) 0.0270(3) Uani 1 1 d . . . 
O3 O 1.27992(12) 0.47237(11) 0.08226(9) 0.0259(3) Uani 1 1 d . . . 
N1 N 0.88274(13) 0.19898(12) 0.02460(9) 0.0177(3) Uani 1 1 d . . . 
N2 N 0.96365(12) 0.26552(13) -0.03985(9) 0.0176(3) Uani 1 1 d . . . 
C1 C 0.75434(15) 0.12162(15) -0.03517(11) 0.0176(3) Uani 1 1 d . . . 
C2 C 0.64068(16) 0.19094(15) -0.11576(11) 0.0205(3) Uani 1 1 d . . . 
H2A H 0.6478 0.2878 -0.1306 0.025 Uiso 1 1 calc R . . 
C3 C 0.51677(16) 0.11650(16) -0.17417(12) 0.0226(3) Uani 1 1 d . . . 
H3A H 0.4390 0.1623 -0.2304 0.027 Uiso 1 1 calc R . . 
C4 C 0.50601(17) -0.02510(16) -0.15063(12) 0.0231(3) Uani 1 1 d . . . 
H4A H 0.4204 -0.0754 -0.1899 0.028 Uiso 1 1 calc R . . 
C5 C 0.62021(17) -0.09273(15) -0.06992(12) 0.0230(3) Uani 1 1 d . . . 
H5A H 0.6124 -0.1893 -0.0541 0.028 Uiso 1 1 calc R . . 
C6 C 0.74627(16) -0.02003(15) -0.01185(12) 0.0208(3) Uani 1 1 d . . . 
H6A H 0.8252 -0.0664 0.0426 0.025 Uiso 1 1 calc R . . 
C7 C 0.93683(15) 0.22274(15) 0.14517(11) 0.0192(3) Uani 1 1 d . . . 
C8 C 1.05729(16) 0.30676(15) 0.16074(11) 0.0203(3) Uani 1 1 d . . . 
H8A H 1.1188 0.3415 0.2340 0.024 Uiso 1 1 calc R . . 
C9 C 1.06899(15) 0.32973(14) 0.04385(11) 0.0175(3) Uani 1 1 d . . . 
C10 C 1.18533(15) 0.40920(14) 0.01108(11) 0.0181(3) Uani 1 1 d . . . 
C11 C 1.28563(18) 0.47383(18) -0.14629(14) 0.0315(4) Uani 1 1 d . . . 
H11A H 1.2854 0.5723 -0.1234 0.047 Uiso 1 1 calc R . . 
H11B H 1.2648 0.4665 -0.2338 0.047 Uiso 1 1 calc R . . 
H11C H 1.3815 0.4332 -0.1086 0.047 Uiso 1 1 calc R . . 
  
loop_ 
 _atom_site_aniso_label 
 _atom_site_aniso_U_11 
 _atom_site_aniso_U_22 
 _atom_site_aniso_U_33 
 _atom_site_aniso_U_23 
 _atom_site_aniso_U_13 
 _atom_site_aniso_U_12 
O1 0.0242(6) 0.0398(7) 0.0122(4) -0.0014(4) 0.0048(4) -0.0089(5) 
O2 0.0260(6) 0.0387(7) 0.0182(5) 0.0002(4) 0.0090(4) -0.0069(5) 
O3 0.0244(6) 0.0291(6) 0.0224(5) -0.0020(4) 0.0033(4) -0.0055(5) 
N1 0.0167(6) 0.0232(6) 0.0126(5) 0.0000(4) 0.0032(4) 0.0000(5) 
N2 0.0159(6) 0.0223(6) 0.0146(5) 0.0012(4) 0.0041(4) -0.0002(5) 
C1 0.0167(7) 0.0244(7) 0.0120(5) -0.0018(5) 0.0043(5) -0.0006(6) 
C2 0.0219(8) 0.0218(7) 0.0169(6) 0.0006(5) 0.0039(6) 0.0004(6) 
C3 0.0182(7) 0.0297(8) 0.0180(6) -0.0011(6) 0.0016(5) 0.0016(6) 
C4 0.0211(7) 0.0286(8) 0.0206(6) -0.0081(5) 0.0074(6) -0.0055(6) 
C5 0.0287(8) 0.0199(7) 0.0226(7) -0.0035(5) 0.0111(6) -0.0013(6) 
C6 0.0223(8) 0.0232(7) 0.0168(6) 0.0005(5) 0.0050(5) 0.0038(6) 
C7 0.0197(7) 0.0247(7) 0.0127(6) 0.0000(5) 0.0037(5) 0.0021(6) 
C8 0.0188(7) 0.0261(8) 0.0149(6) -0.0020(5) 0.0030(5) -0.0008(6) 
C9 0.0161(7) 0.0188(7) 0.0169(6) 0.0002(5) 0.0032(5) 0.0031(5) 
C10 0.0184(7) 0.0187(7) 0.0170(6) 0.0010(5) 0.0043(5) 0.0049(5) 
C11 0.0299(9) 0.0409(10) 0.0279(8) 0.0039(7) 0.0151(7) -0.0050(7) 
  
_geom_special_details 
; 
 All esds (except the esd in the dihedral angle between two l.s. planes) 
 are estimated using the full covariance matrix.  The cell esds are taken 
 into account individually in the estimation of esds in distances, angles 
 and torsion angles; correlations between esds in cell parameters are only 
 used when they are defined by crystal symmetry.  An approximate (isotropic) 
 treatment of cell esds is used for estimating esds involving l.s. planes. 
; 
  
loop_ 
 _geom_bond_atom_site_label_1 
 _geom_bond_atom_site_label_2 
 _geom_bond_distance 
 _geom_bond_site_symmetry_2 
 _geom_bond_publ_flag 
O1 C7 1.3345(16) . ? 
O2 C10 1.3401(16) . ? 
O2 C11 1.4526(18) . ? 
O3 C10 1.2059(17) . ? 
N1 N2 1.3689(15) . ? 
N1 C7 1.3690(16) . ? 
N1 C1 1.4375(18) . ? 
N2 C9 1.3403(17) . ? 
C1 C6 1.390(2) . ? 
C1 C2 1.3913(19) . ? 
C2 C3 1.388(2) . ? 
C3 C4 1.393(2) . ? 
C4 C5 1.387(2) . ? 
C5 C6 1.394(2) . ? 
C7 C8 1.374(2) . ? 
C8 C9 1.4056(17) . ? 
C9 C10 1.478(2) . ? 
  
loop_ 
 _geom_angle_atom_site_label_1 
 _geom_angle_atom_site_label_2 
 _geom_angle_atom_site_label_3 
 _geom_angle 
 _geom_angle_site_symmetry_1 
 _geom_angle_site_symmetry_3 
 _geom_angle_publ_flag 
C10 O2 C11 115.34(12) . . ? 
N2 N1 C7 111.52(11) . . ? 
N2 N1 C1 120.73(10) . . ? 
C7 N1 C1 127.68(11) . . ? 
C9 N2 N1 104.05(10) . . ? 
C6 C1 C2 121.47(13) . . ? 
C6 C1 N1 119.68(12) . . ? 
C2 C1 N1 118.85(13) . . ? 
C3 C2 C1 119.06(13) . . ? 
C2 C3 C4 120.23(13) . . ? 
C5 C4 C3 120.03(13) . . ? 
C4 C5 C6 120.47(13) . . ? 
C1 C6 C5 118.73(13) . . ? 
O1 C7 N1 117.82(12) . . ? 
O1 C7 C8 134.69(12) . . ? 
N1 C7 C8 107.47(11) . . ? 
C7 C8 C9 104.41(12) . . ? 
N2 C9 C8 112.55(12) . . ? 
N2 C9 C10 121.21(11) . . ? 
C8 C9 C10 126.18(12) . . ? 
O3 C10 O2 124.39(13) . . ? 
O3 C10 C9 123.87(12) . . ? 
O2 C10 C9 111.72(12) . . ? 
  
loop_ 
 _geom_torsion_atom_site_label_1 
 _geom_torsion_atom_site_label_2 
 _geom_torsion_atom_site_label_3 
 _geom_torsion_atom_site_label_4 
 _geom_torsion 
 _geom_torsion_site_symmetry_1 
 _geom_torsion_site_symmetry_2 
 _geom_torsion_site_symmetry_3 
 _geom_torsion_site_symmetry_4 
 _geom_torsion_publ_flag 
C7 N1 N2 C9 0.41(15) . . . . ? 
C1 N1 N2 C9 177.64(12) . . . . ? 
N2 N1 C1 C6 120.33(13) . . . . ? 
C7 N1 C1 C6 -62.93(19) . . . . ? 
N2 N1 C1 C2 -59.47(17) . . . . ? 
C7 N1 C1 C2 117.27(15) . . . . ? 
C6 C1 C2 C3 -0.13(19) . . . . ? 
N1 C1 C2 C3 179.67(11) . . . . ? 
C1 C2 C3 C4 1.0(2) . . . . ? 
C2 C3 C4 C5 -1.0(2) . . . . ? 
C3 C4 C5 C6 0.0(2) . . . . ? 
C2 C1 C6 C5 -0.81(19) . . . . ? 
N1 C1 C6 C5 179.40(11) . . . . ? 
C4 C5 C6 C1 0.87(19) . . . . ? 
N2 N1 C7 O1 178.38(12) . . . . ? 
C1 N1 C7 O1 1.4(2) . . . . ? 
N2 N1 C7 C8 -0.31(16) . . . . ? 
C1 N1 C7 C8 -177.30(13) . . . . ? 
O1 C7 C8 C9 -178.29(16) . . . . ? 
N1 C7 C8 C9 0.08(15) . . . . ? 
N1 N2 C9 C8 -0.36(15) . . . . ? 
N1 N2 C9 C10 177.11(12) . . . . ? 
C7 C8 C9 N2 0.18(16) . . . . ? 
C7 C8 C9 C10 -177.14(13) . . . . ? 
C11 O2 C10 O3 -1.5(2) . . . . ? 
C11 O2 C10 C9 -179.80(12) . . . . ? 
N2 C9 C10 O3 177.62(13) . . . . ? 
C8 C9 C10 O3 -5.3(2) . . . . ? 
N2 C9 C10 O2 -4.12(18) . . . . ? 
C8 C9 C10 O2 172.99(13) . . . . ? 
  
_diffrn_measured_fraction_theta_max    0.988 
_diffrn_reflns_theta_full              27.88 
_diffrn_measured_fraction_theta_full   0.988 
_refine_diff_density_max    0.327 
_refine_diff_density_min   -0.197 
_refine_diff_density_rms    0.051 
